# Supplementary material
Source: PubMed Central journal article supplement (PMC3121455)
Supplement: supp_M110.196360_jbc.M110.196360-1.pdf [file supp_M110.196360_jbc.M110.196360-1.pdf]

**Supplementary Figure Legends**

**Suppl. Fig. S1.** Model for Doa10 TM5 function in coordinating Ubc6 activity. In this speculative cartoon, the TM5 Glu633 forms a network of interactions within Doa10 to create a gate between the Ubc6 “E2 site” (green, on right) and the membrane protein “substrate site” (light blue, on left) of Doa10. Normally, only a small fraction of Ubc6 can slip laterally into the substrate binding site, which might require the ubiquitin (Ub) thiolester form of Ubc6. In the *doa10-E633Q* mutant, the gate is perturbed, allowing frequent Ubc6 movement into the substrate site, ubiquitylation of this Ubc6 molecule by a second Ubc6 protein present in the E2 site, and rapid Ubc6 degradation. K, lysine residue that becomes modified by Ub.

Suppl. Fig. S1. Kreft & Hochstrasser

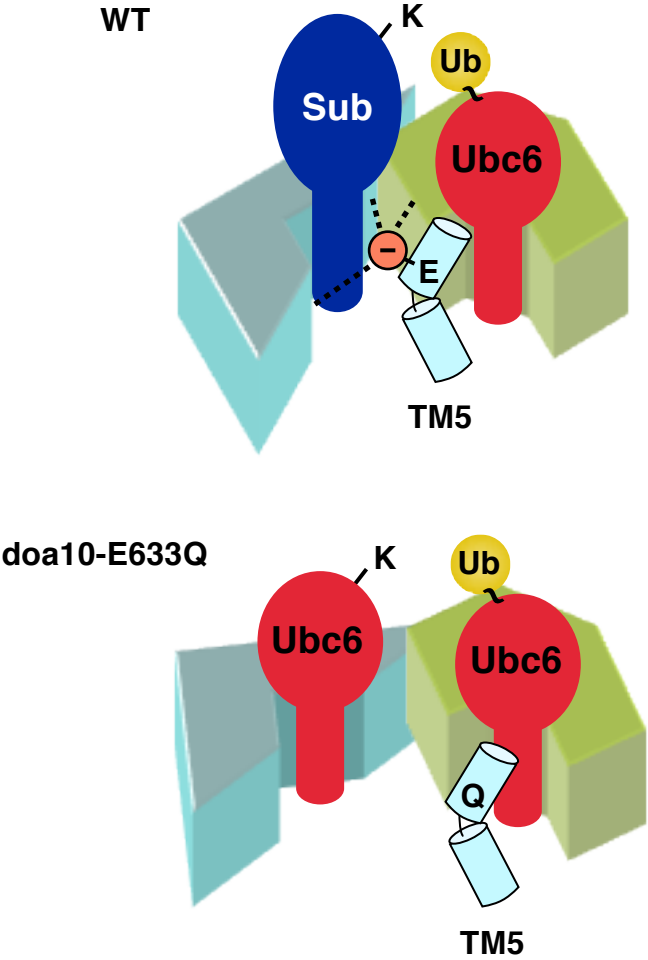

## Table S1. Kreft & Hochstrasser

Table S1. Yeast strains used in this study

| Strain  | Genotype                                                             | Source                      |
|---------|----------------------------------------------------------------------|-----------------------------|
| MHY500  | <i>a his3-200 leu2-3,112 ura3-52 lys2-801 trp1-1</i>                 | Chen et al., 1993           |
| MHY1310 | <i>a his3-200 leu2-3,112::LEU2-Deg1-lacZ ura3-52 lys2-801 trp1-1</i> | M.H. lab, unpublished       |
| MHY1685 | MHY500 with <i>doa10Δ::HIS3</i>                                      | Swanson et al. (2001)       |
| MHY3118 | MHY500 with <i>doa10-E633Q</i>                                       | This study                  |
| MHY3191 | MHY1310 with <i>doa10::CORE cassette</i> integrated at ORF pos. 1914 | This study                  |
| MHY3255 | MHY1310 with <i>doa10-E633Q</i>                                      | This study                  |
| MHY3280 | MHY1310 with <i>doa10-G642V</i>                                      | This study                  |
| MHY3283 | MHY1310 with <i>doa10-G642A</i>                                      | This study                  |
| MHY3297 | MHY1310 with <i>doa10-P638A</i>                                      | This study                  |
| MHY3299 | MHY1310 with <i>doa10-P638A/G642A</i>                                | This study                  |
| MHY3333 | MHY1310 with <i>ubc7Δ::LEU2</i>                                      | This study                  |
| MHY3335 | MHY1310 with <i>ubc7Δ::LEU2 doa10-E633Q</i>                          | This study                  |
| MHY3339 | MHY1310 with <i>doa10-C39S</i>                                       | This study                  |
| MHY3340 | MHY1310 with <i>doa10-C39S/E633Q</i>                                 | This study                  |
| MHY3367 | MHY1310 with <i>ubc6-Δ1::HIS3</i>                                    | This study                  |
| MHY3368 | MHY1310 with <i>ubc6-Δ1::HIS3 doa10-E633Q</i>                        | This study                  |
| MHY3416 | MHY1310 with <i>doa10-E633A</i>                                      | This study                  |
| MHY3417 | MHY1310 with <i>doa10-E633K</i>                                      | This study                  |
| MHY3443 | MHY1310 with <i>doa10-E633R</i>                                      | This study                  |
| MHY3481 | MHY500 with <i>doa10Δ::HIS3</i>                                      | This study                  |
| MHY3612 | MHY1310 with <i>DOA10-yEGFP::his5<sup>+</sup></i>                    | Deng and Hochstrasser, 2006 |
| MHY3693 | MHY1310 with <i>doa10-E633Q-yEGFP::his5<sup>+</sup></i>              | Deng and Hochstrasser, 2006 |
| MHY4268 | MHY1310 with <i>doa10-G636R</i>                                      | This study                  |
| SKY166  | MHY1310 with <i>doa10Δ::hphMX4</i>                                   | This study                  |
| SKY212  | MHY500 with <i>doa10-E633Q ubc6-Δ1::HIS3</i>                         | This study                  |
| SKY218  | MHY500 with <i>ubc6-Δ1::HIS3</i>                                     | Sommer and Jentsch, 1993    |
| SKY225  | MHY500 with <i>doa10-G636R</i>                                       | This study                  |
| SKY254  | MHY1310 with <i>doa10-E633D</i>                                      | This study                  |
| SKY263  | MHY1310 with <i>doa10-D646A</i>                                      | This study                  |
| SKY263  | MHY1310 with <i>doa10-D646N</i>                                      | This study                  |
| SKY290  | MHY1310 with <i>doa10-E633D ubc6-Δ1::HIS3</i>                        | This study                  |
| SKY293  | MHY1310 with <i>doa10-G642A ubc6-Δ1::HIS3</i>                        | This study                  |
